# Supplementary material for: Relationship Between HDL Functional Characteristics and Cardiovascular Health and Potential Impact of Dietary Patterns: A Narrative Review
Source: PubMed Central journal article supplement (PMC6627343; doi:10.3390/nu11061231), 2019-05-30
Supplement: nutrients-11-01231-s001.pdf [file nutrients-11-01231-s001.pdf]

**Table S1 HDL concentration, HDL-related Functional Parameters and Mediterranean Diet**

| Study (reference #)        | Subjects N= | Dietary Intervention       | Time Interval | HDL-C Concentration                        | HDL Profile                            | Endothelial Function                       | Cholesterol Efflux Capacity | LCAT, CTEP | HDL Antioxidant Function | Immunomodulation, Oxidative Stress Biomarker                                                 |
|----------------------------|-------------|----------------------------|---------------|--------------------------------------------|----------------------------------------|--------------------------------------------|-----------------------------|------------|--------------------------|----------------------------------------------------------------------------------------------|
| Estruch et al. (73)        | 772         | MED-EVOO, MED-NUT, Control | 3 month       | Increase in both MED diets, and vs control |                                        |                                            |                             |            |                          | Decrease in CRP with MED-EVOO diet; and in IL-6, ICAM-1, VCAM-1 in both MED-EVOO and MED-NUT |
| Esposito et al. (64)       | 180         | MED, Control               | 2 year        | Increase in MED vs control                 |                                        | Increase L-arginine test in MED vs control |                             |            |                          | Decrease in hsCRP, IL-6, IL-7, IL-18 in MED vs control                                       |
| Davis et al. (65)          | 166         | MED, Control               | 6 month       |                                            |                                        | Increase FMD in MED vs control             |                             |            |                          |                                                                                              |
| Davis et al. (74)          | 166         | MED, Control               | 6 month       | No significant change                      |                                        |                                            |                             |            |                          | Decrease in F2-Isoprostane MED vs control                                                    |
| Rallidis et al. (66)       | 90          | Greek MED, Control         | 2 month       | No significant change                      |                                        | Increase FMD in MED                        |                             |            |                          |                                                                                              |
| Rallidis et al. (67)       | 90          | Greek MED, Control         | 2 month       |                                            |                                        |                                            |                             |            |                          | Decrease in CRP, sP-Selectin, sE-Selectin in MED                                             |
| Kanstantinidou et al. (68) | 90          | EVOO, Washed OO, Control   | 3 month       | Decrease in EVOO                           |                                        |                                            |                             |            |                          | Decrease IFN $\gamma$ , sP-Selectin in EVOO                                                  |
| Fito et al. (69)           | 372         | MED-EVOO, MED-NUT, Control | 3 month       | Increase in MED-NUT                        |                                        |                                            |                             |            |                          | Decrease plasma oxLDL in MED-EVOO                                                            |
| Damasceno et al. (70)      | 169         | MED-EVOO, MED-NUT, Control | 1 year        | No significant change                      | Increase large HDL and total particles |                                            |                             |            |                          |                                                                                              |
| Casas et al. (71)          | 165         | MED-EVOO, MED-NUT, Control | 3-5 year      | Increase in both MED diets                 |                                        |                                            |                             |            |                          | Decrease hsCRP, IL-6, TNF $\alpha$ , MCP-1, and PBMC adhesion molecules CD40,                |

|                       |     |                            |        |                       |                                            |                                                                                                                     |                                           |                                             |                                             | CD49d in MED-EVOO and MED-NUTS vs Control       |
|-----------------------|-----|----------------------------|--------|-----------------------|--------------------------------------------|---------------------------------------------------------------------------------------------------------------------|-------------------------------------------|---------------------------------------------|---------------------------------------------|-------------------------------------------------|
| Storniolo et al. (72) | 90  | MED-EVOO, MED-NUT, Control | 1 year |                       |                                            | Increase serum NO metabolites in MED-EVOO; Decrease ET-1 in MED-NUT; PBMC gene expression altered in both MED diets |                                           |                                             |                                             | Increase serum antioxidant capacity in MED-EVOO |
| Hernaiz et al. (61)   | 296 | MED-EVOO, MED-NUT, Control | 1 year | No significant change | Increase large HDL in MED-EVOO and MED-NUT | Increase HDL induced NO from HUVEC cells in MED-EVOO vs control                                                     | Increase CEC from THP-1 cells in MED-EVOO | Increase LCAT and decrease CETP in MED-EVOO | Increase PON-1 and LDL lag time in MED-EVOO |                                                 |

Legend: CRP = C-reactive protein; ET-1 = Endothelin-1; EVOO = Extra virgin olive oil; HDL = High-density lipoprotein; HUVEC = Human umbilical vein endothelial cells; ICAM = Intracellular cell adhesion molecule; IFN = Interferon; IL = Interleukin; MCP-1 = Monocyte chemotactic protein-1; MED = Mediterranean; NUT = Nuts; OO = Olive oil; oxLDL = oxidized LDL; PBMC = Peripheral blood mononuclear cells; PON-1 = Paraoxonase-1; THP-1 = Human monocyte cells; TNF = Tumor necrosis factor; VCAM = Vascular cell adhesion molecule
